# Supplementary material
Source: PubMed Central journal article supplement (PMC9186113)
Supplement: mmc1.pdf [file mmc1.pdf]

# Differential reporting of biodiversity in two citizen science platforms during COVID-19 lockdown in Colombia.

## Supplementary material

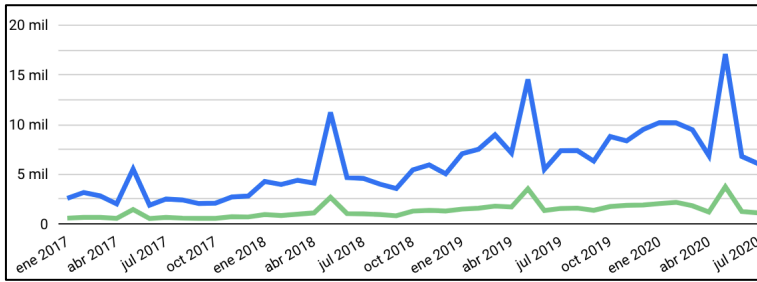

**Figure S1.** Number of checklists (blue) and eBirders (green) submitted for Colombia per month from January 2017 to October 2020. The peak in submissions and participants shown each year coincides with Global Big Day (GBD) which always takes place in early May (source: eBird Colombia dashboard).

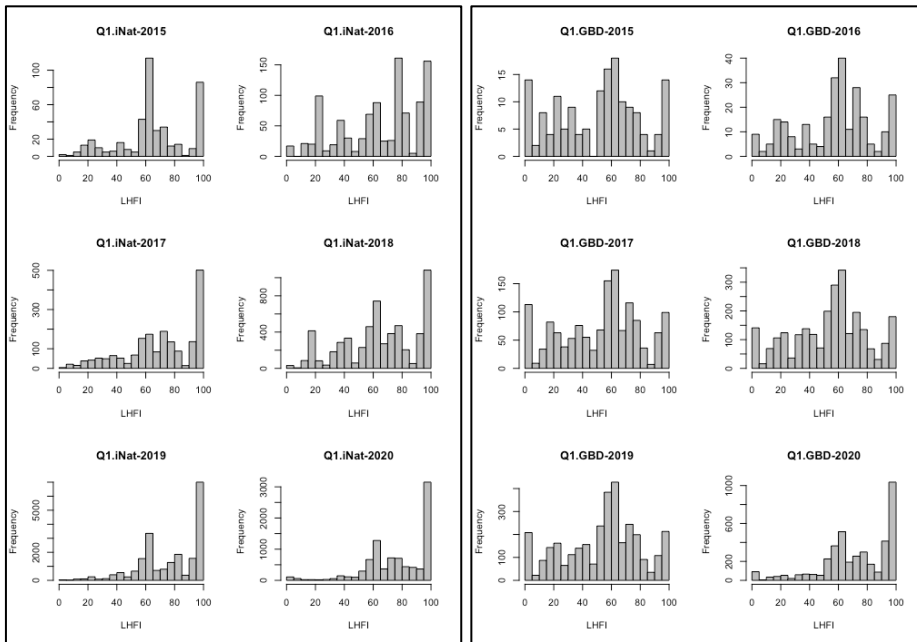

**Figure S2.** Histograms showing the distribution of records for iNaturalist (left) and checklists for eBird (right) according to Colombia's Legacy-adjusted Human Footprint Index from 2015-2020. Data was subsequently split into records with LFHI values greater than or equal to 90 and records with values less than 90.

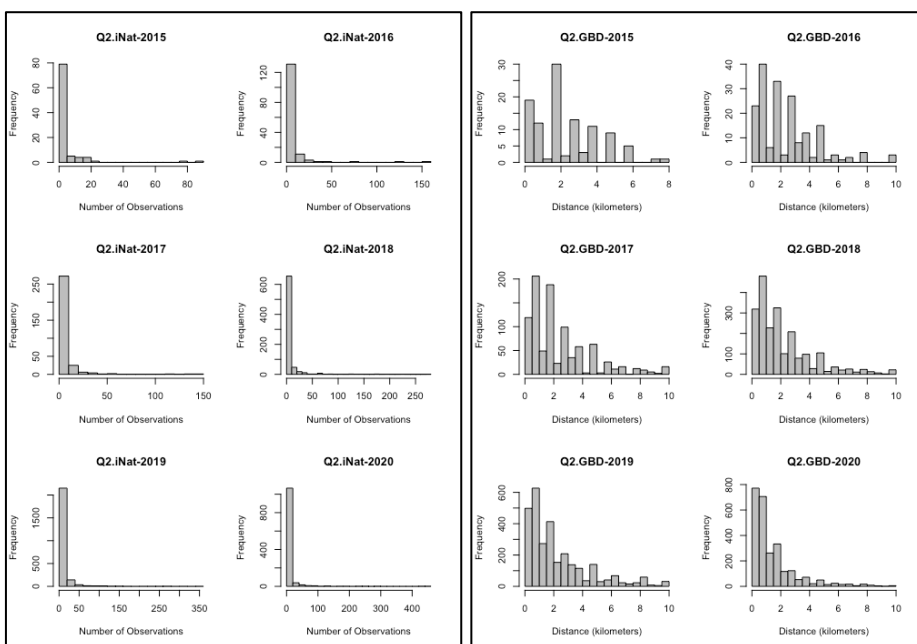

**Figure S3.** Histograms showing the distribution of sampling effort for iNaturalist as number of observations submitted per observer (left data was subsequently split into observers with 5 or less observations and observers with more than 5 observations) and for eBird as distance covered per checklist (right). For iNaturalist. For eBird-distance data was subsequently split into checklists with effort of 1 km or less and checklists with effort greater than 1 km.

Differential reporting of biodiversity in two citizen science platforms during COVID-19 lockdown in Colombia.

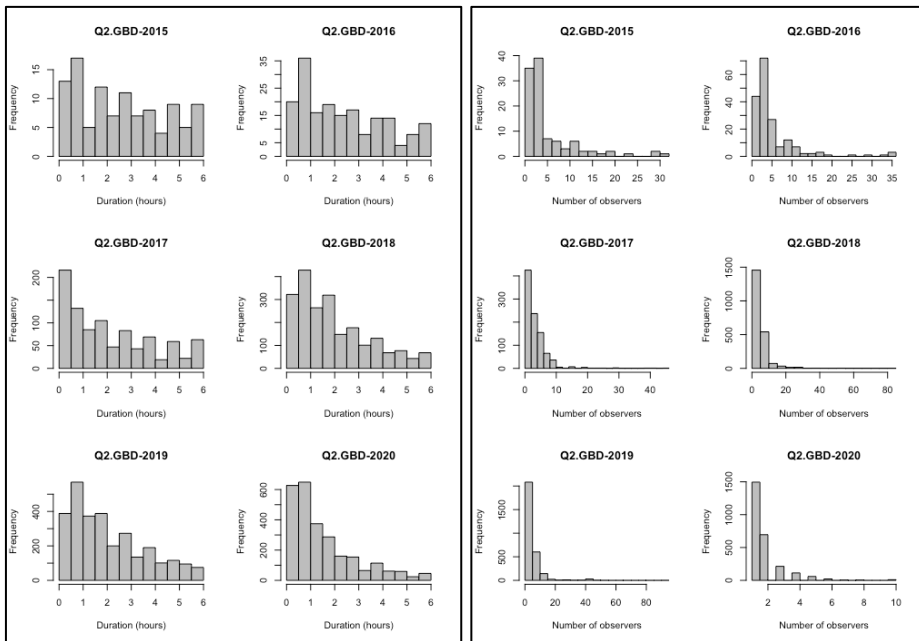

**Figure S4.** Histograms showing the distribution of sampling effort during our study periods from 2015-2020 for eBird as duration per checklist (left) and number of observers per checklist (right). For eBird-duration data was subsequently split into checklists with effort of 1 hour or less and checklists with effort greater than 1 hour. For eBird-group size data was subsequently split into checklists done by a single observers and checklists done by more than one observer.

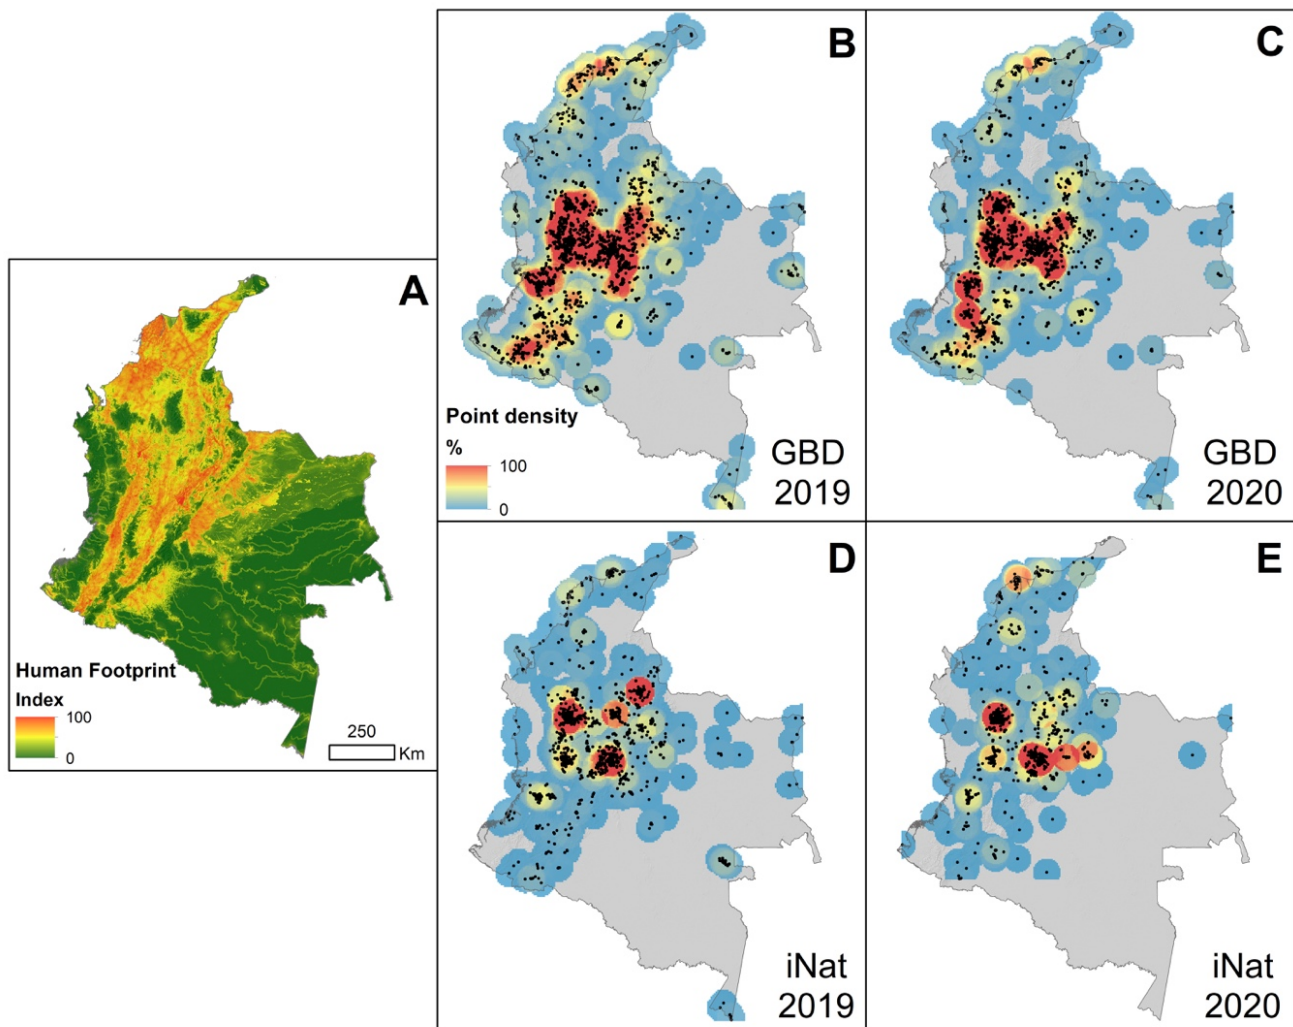

**Figure S5.** A) Legacy-adjusted Human Footprint Index for Colombia (Correa Ayram et al., 2020); B-C) Record distribution in iNaturalist from March 25<sup>th</sup> to April 25<sup>th</sup> of 2019 and 2020; D-E) Checklist distribution in eBird from Global Big Days of 2019 and 2020.

## Differential reporting of biodiversity in two citizen science platforms during COVID-19 lockdown in Colombia.

**Table S1.** Statistical output for logistic regressions of year vs. the proportion of records for iNaturalist and checklists for eBird that were submitted from sites with Legacy-adjusted Human Footprint Index values greater than or equal to 90 (relatively dense human settlements) from 2015-2020.

| Dataset | Coeff.    | Est.  | SE   | z-value | Pr(> z )  | Res.Dev | Res.DF | Dev/DF |
|---------|-----------|-------|------|---------|-----------|---------|--------|--------|
| iNat    | 2020 (b0) | -0.46 | 0.02 | -21.34  | <2.00E-16 | 51,722  | 39,235 | 1.32   |
| iNat    | 2015 (b1) | -0.81 | 0.12 | -6.85   | 7.20E-12  | -       | -      | -      |
| iNat    | 2016 (b2) | -0.67 | 0.08 | -8.71   | <2.00E-16 | -       | -      | -      |
| iNat    | 2017 (b3) | -0.23 | 0.05 | -4.31   | 1.67E-05  | -       | -      | -      |
| iNat    | 2018 (b4) | -0.62 | 0.04 | -16.83  | <2.00E-16 | -       | -      | -      |
| iNat    | 2019 (b5) | 0.09  | 0.03 | 3.38    | 7.00E-04  | -       | -      | -      |
| GBD     | 2020 (b0) | -0.58 | 0.03 | -17.69  | <2.00E-16 | 10,419  | 11,733 | 0.89   |
| GBD     | 2015 (b1) | -1.47 | 0.25 | -5.83   | 5.69E-09  | -       | -      | -      |
| GBD     | 2016 (b2) | -1.30 | 0.18 | -7.01   | 2.32E-12  | -       | -      | -      |
| GBD     | 2017 (b3) | -1.47 | 0.09 | -16.43  | <2.00E-16 | -       | -      | -      |
| GBD     | 2018 (b4) | -1.58 | 0.07 | -21.81  | <2.00E-16 | -       | -      | -      |
| GBD     | 2019 (b5) | -1.64 | 0.07 | -24.33  | <2.00E-16 | -       | -      | -      |

**Table S2.** Statistical output for generalized linear models of year vs. the number of records for iNaturalist and checklists for eBird that were submitted from sites with Legacy-adjusted Human Footprint Index values less than 90 from 2019-2020.

| Dataset | Model             | Coeff.    | Est. | SE    | z-value | Pr(> z )  | Res.Dev | Res.DF | Dev/DF | Theta | SE   |
|---------|-------------------|-----------|------|-------|---------|-----------|---------|--------|--------|-------|------|
| iNat    | Poisson           | 2019 (b0) | 4.16 | 0.001 | 3712.82 | <2.00E-16 | 89,954  | 18,011 | 4.99   | -     | -    |
| iNat    | Poisson           | 2020 (b1) | 0.02 | 0.002 | 8.35    | <2.00E-16 | -       | -      | -      | -     | -    |
| iNat    | Negative binomial | 2019 (b0) | 4.16 | 0.003 | 1551.09 | <2.00E-16 | 19,852  | 18,011 | 1.10   | 13.54 | 0.19 |
| iNat    | Negative binomial | 2020 (b1) | 0.02 | 0.005 | 3.47    | 5.E-04    | -       | -      | -      | -     | -    |
| GBD     | Poisson           | 2019 (b0) | 3.90 | 0.003 | 1491.49 | <2.00E-16 | 67,435  | 5,536  | 12.18  | -     | -    |
| GBD     | Poisson           | 2020 (b1) | 0.19 | 0.004 | 52.59   | <2.00E-16 | -       | -      | -      | -     | -    |
| GBD     | Negative binomial | 2019 (b0) | 3.90 | 0.011 | 344.5   | <2.00E-16 | 6,861   | 5,537  | 1.24   | 2.79  | 0.06 |
| GBD     | Negative binomial | 2020 (b1) | 0.19 | 0.017 | 11.6    | <2.00E-16 | -       | -      | -      | -     | -    |

## Differential reporting of biodiversity in two citizen science platforms during COVID-19 lockdown in Colombia.

**Table S3.** Statistical output for logistic regressions of year vs. six metrics of level and type of participation in iNaturalist and eBird for out study periods.

| Dataset | Metric            | Coeff.    | Est.  | SE   | z-value | Pr(> z )  | Res.Dev | Res.DF | Dev/DF |
|---------|-------------------|-----------|-------|------|---------|-----------|---------|--------|--------|
| iNat    | Observer effort   | 2020 (b0) | -1.37 | 0.07 | -18.61  | <2.00E-16 | 5,659   | 4,825  | 1.17   |
| iNat    | Observer effort   | 2015 (b1) | -0.23 | 0.28 | -0.82   | 0.42      | -       | -      | -      |
| iNat    | Observer effort   | 2016 (b2) | 0.32  | 0.20 | 1.60    | 0.11      | -       | -      | -      |
| iNat    | Observer effort   | 2017 (b3) | 0.12  | 0.15 | 0.79    | 0.43      | -       | -      | -      |
| iNat    | Observer effort   | 2018 (b4) | 0.23  | 0.11 | 2.01    | 0.04      | -       | -      | -      |
| iNat    | Observer effort   | 2019 (b5) | 0.75  | 0.09 | 8.84    | <2.00E-16 | -       | -      | -      |
| iNat    | Curator effort    | 2020 (b0) | -0.22 | 0.02 | -10.42  | <2.00E-16 | 50,902  | 38,622 | 1.32   |
| iNat    | Curator effort    | 2015 (b1) | 0.54  | 0.09 | 5.94    | 2.86E-09  | -       | -      | -      |
| iNat    | Curator effort    | 2016 (b2) | 0.84  | 0.07 | 12.33   | <2.00E-16 | -       | -      | -      |
| iNat    | Curator effort    | 2017 (b3) | 0.34  | 0.05 | 6.68    | 2.38E-11  | -       | -      | -      |
| iNat    | Curator effort    | 2018 (b4) | 0.08  | 0.03 | 2.22    | 0.03      | -       | -      | -      |
| iNat    | Curator effort    | 2019 (b5) | -0.48 | 0.03 | -18.26  | <2.00E-16 | -       | -      | -      |
| GBD     | Distance effort   | 2020 (b0) | 0.26  | 0.04 | 6.55    | 5.90E-11  | 11,879  | 8,897  | 1.34   |
| GBD     | Distance effort   | 2015 (b1) | -1.15 | 0.22 | -5.33   | 9.94E-08  | -       | -      | -      |
| GBD     | Distance effort   | 2016 (b2) | -0.90 | 0.16 | -5.62   | 1.89E-08  | -       | -      | -      |
| GBD     | Distance effort   | 2017 (b3) | -0.90 | 0.08 | -11.39  | <2.00E-16 | -       | -      | -      |
| GBD     | Distance effort   | 2018 (b4) | -0.78 | 0.06 | -13.10  | <2.00E-16 | -       | -      | -      |
| GBD     | Distance effort   | 2019 (b5) | -0.72 | 0.05 | -13.07  | <2.00E-16 | -       | -      | -      |
| GBD     | Sampling protocol | 2020 (b0) | -0.16 | 0.03 | -6.50   | 8.18E-11  | 18,392  | 15,912 | 1.16   |
| GBD     | Sampling protocol | 2015 (b1) | 2.35  | 0.27 | 8.61    | <2.00E-16 | -       | -      | -      |
| GBD     | Sampling protocol | 2016 (b2) | 1.40  | 0.14 | 9.90    | <2.00E-16 | -       | -      | -      |
| GBD     | Sampling protocol | 2017 (b3) | 1.19  | 0.06 | 19.28   | <2.00E-16 | -       | -      | -      |
| GBD     | Sampling protocol | 2018 (b4) | 1.50  | 0.05 | 30.06   | <2.00E-16 | -       | -      | -      |
| GBD     | Sampling protocol | 2019 (b5) | 1.68  | 0.05 | 35.44   | <2.00E-16 | -       | -      | -      |
| GBD     | Duration effort   | 2020 (b0) | -0.05 | 0.04 | -1.33   | 0.18      | 11,685  | 8,897  | 1.31   |
| GBD     | Duration effort   | 2015 (b1) | -0.89 | 0.22 | -4.07   | 4.66E-05  | -       | -      | -      |
| GBD     | Duration effort   | 2016 (b2) | -0.77 | 0.17 | -4.65   | 3.40E-06  | -       | -      | -      |
| GBD     | Duration effort   | 2017 (b3) | -0.48 | 0.08 | -6.21   | 5.24E-10  | -       | -      | -      |
| GBD     | Duration effort   | 2018 (b4) | -0.57 | 0.06 | -9.52   | <2.00E-16 | -       | -      | -      |
| GBD     | Duration effort   | 2019 (b5) | -0.66 | 0.06 | -11.82  | <2.00E-16 | -       | -      | -      |
| GBD     | Group size        | 2020 (b0) | 0.29  | 0.04 | 7.33    | 2.33E-13  | 8,214   | 8,890  | 0.92   |
| GBD     | Group size        | 2015 (b1) | -2.18 | 0.29 | -7.54   | 4.54E-14  | -       | -      | -      |
| GBD     | Group size        | 2016 (b2) | -2.39 | 0.24 | -9.94   | <2.00E-16 | -       | -      | -      |
| GBD     | Group size        | 2017 (b3) | -1.95 | 0.10 | -20.07  | <2.00E-16 | -       | -      | -      |
| GBD     | Group size        | 2018 (b4) | -2.32 | 0.08 | -29.69  | <2.00E-16 | -       | -      | -      |
| GBD     | Group size        | 2019 (b5) | -2.33 | 0.07 | -33.15  | <2.00E-16 | -       | -      | -      |

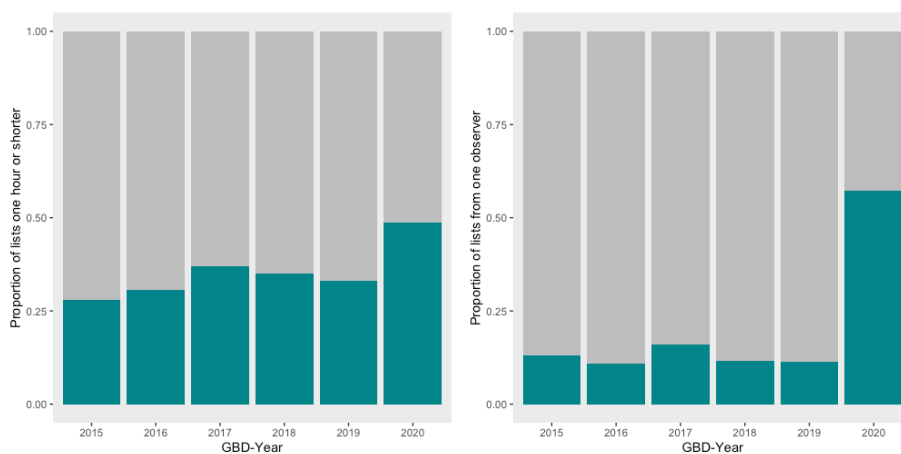

**Figure S6.** Yearly comparisons of effort in terms of duration (left) and observer group size (right) for eBird during our study period. For eBird-duration turquoise shows the proportion of checklists with effort less than or equal to one hour vs. checklists with efforts greater than one hour in grey. For eBird-group size turquoise shows the proportion of checklists done by a single observer vs. checklists done by more than one observer.

Differential reporting of biodiversity in two citizen science platforms during COVID-19 lockdown in Colombia.

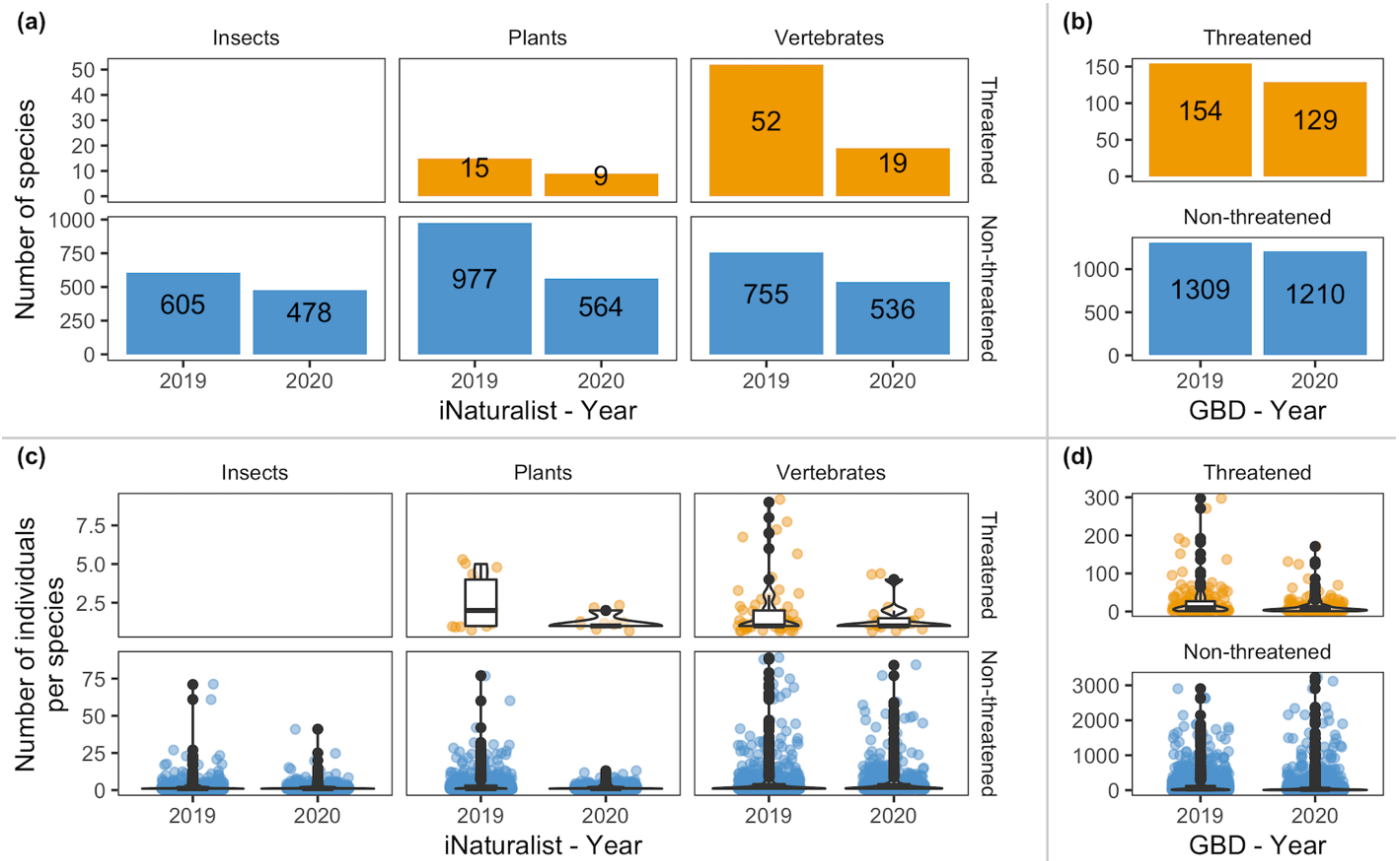

**Figure S7.** Number of species (a and b) and records (c and d) according to threat status (threatened: orange, non-threatened: blue) between 2019 and 2020 in the iNaturalist and eBird datasets. Despite being one of the most recorded taxa in iNaturalist, we had no sources to determine whether recorded insects were threatened.

## Differential reporting of biodiversity in two citizen science platforms during COVID-19 lockdown in Colombia.

**Table S4.** Number of species and records or checklist for the total datasets, as well as for species of conservation priority.

| Dataset | Group      | Year | No. Species | Yearly change |
|---------|------------|------|-------------|---------------|
| iNat    | All        | 2015 | 228         | -             |
| iNat    | All        | 2016 | 414         | 82%           |
| iNat    | All        | 2017 | 592         | 43%           |
| iNat    | All        | 2018 | 1,145       | 93%           |
| iNat    | All        | 2019 | 1,956       | 71%           |
| iNat    | All        | 2020 | 1,292       | -34%          |
| iNat    | Threatened | 2015 | 11          | -             |
| iNat    | Threatened | 2016 | 24          | 118%          |
| iNat    | Threatened | 2017 | 26          | 8%            |
| iNat    | Threatened | 2018 | 69          | 165%          |
| iNat    | Threatened | 2019 | 112         | 62%           |
| iNat    | Threatened | 2020 | 27          | -76%          |
| iNat    | Endemic    | 2015 | 16          | -             |
| iNat    | Endemic    | 2016 | 27          | 69%           |
| iNat    | Endemic    | 2017 | 40          | 48%           |
| iNat    | Endemic    | 2018 | 114         | 185%          |
| iNat    | Endemic    | 2019 | 257         | 125%          |
| iNat    | Endemic    | 2020 | 109         | -58%          |
| GBD     | All        | 2015 | 846         | -             |
| GBD     | All        | 2016 | 948         | 12%           |
| GBD     | All        | 2017 | 1,483       | 56%           |
| GBD     | All        | 2018 | 1,542       | 4%            |
| GBD     | All        | 2019 | 1,584       | 3%            |
| GBD     | All        | 2020 | 1,435       | -9%           |
| GBD     | Threatened | 2015 | 63          | -             |
| GBD     | Threatened | 2016 | 67          | 6%            |
| GBD     | Threatened | 2017 | 133         | 99%           |
| GBD     | Threatened | 2018 | 140         | 5%            |
| GBD     | Threatened | 2019 | 154         | 10%           |
| GBD     | Threatened | 2020 | 129         | -16%          |
| GBD     | Endemic    | 2015 | 30          | -             |
| GBD     | Endemic    | 2016 | 26          | -13%          |
| GBD     | Endemic    | 2017 | 49          | 88%           |
| GBD     | Endemic    | 2018 | 47          | -4%           |
| GBD     | Endemic    | 2019 | 56          | 19%           |
| GBD     | Endemic    | 2020 | 47          | -16%          |

**Table S5.** Statistical output for analysis of deviance between log-linear models comparing the additive and interactive effects of priority species group and year.

| Dataset | Model           | Res.DF | Res.Dev | DF | Deviance | Pr(>Chi) |
|---------|-----------------|--------|---------|----|----------|----------|
| iNat    | Threat + Year   | 5      | 34.14   | -  | -        | -        |
| iNat    | Threat * Year   | 0      | 0       | 5  | 34.14    | 2.23E-06 |
| iNat    | Endemism + Year | 5      | 39.86   | -  | -        | -        |
| iNat    | Endemism * Year | 0      | 0       | 5  | 39.86    | 1.60E-07 |
| GBD     | Threat + Year   | 5      | 7.68    | -  | -        | -        |
| GBD     | Threat * Year   | 0      | 0       | 5  | 7.68     | 0.18     |
| GBD     | Endemism + Year | 5      | 1.67    | -  | -        | -        |
| GBD     | Endemism * Year | 0      | 0       | 5  | 1.67     | 0.89     |

Differential reporting of biodiversity in two citizen science platforms during COVID-19 lockdown in Colombia.

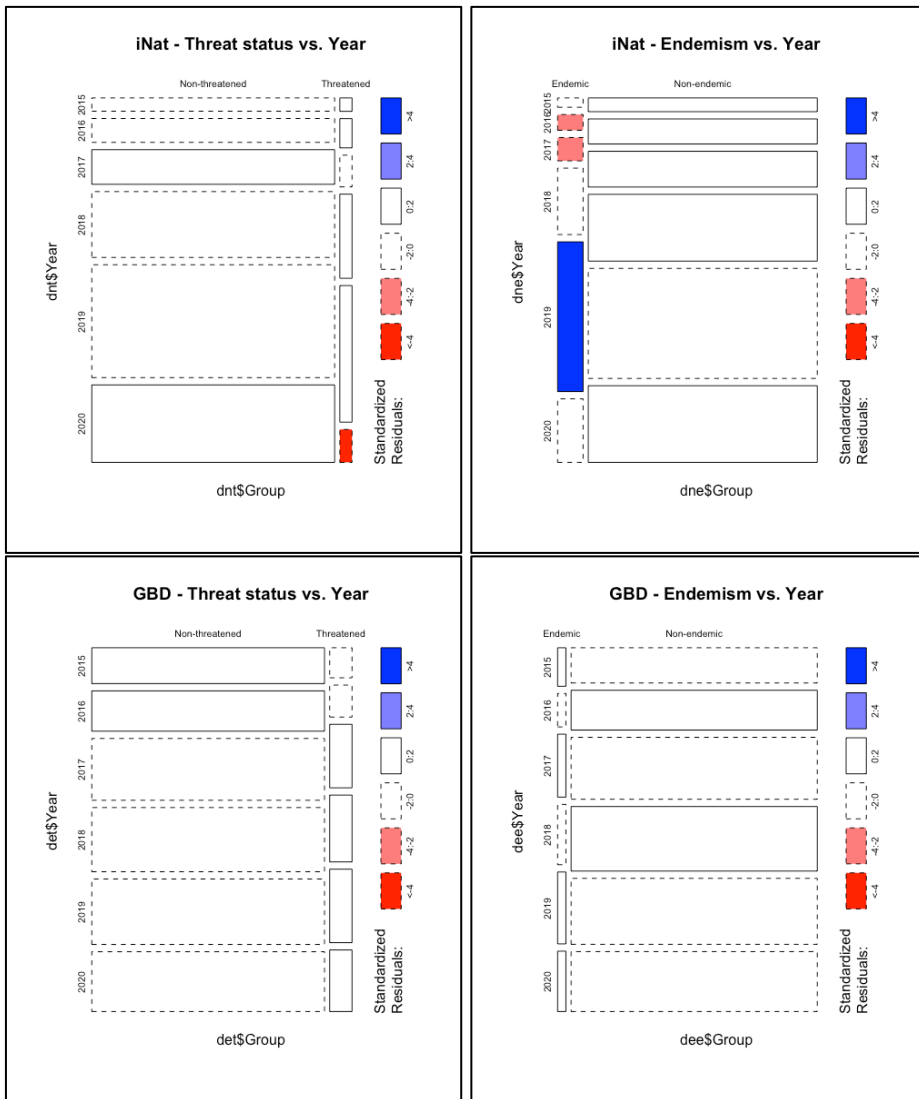

**Figure S8.** Mosaic plots for the interaction of threat status (left) and endemism (right) vs. year for species reported during March 25<sup>th</sup> - April 25<sup>th</sup> of 2015-2020 in iNaturalist (top) and during Global Big Days of 2015-2020 in eBird (bottom).
