# Supplementary material
Source: PubMed Central journal article supplement (PMC9186113)
Supplement: mmc2.pdf [file mmc2.pdf]

## **Appendix B. Spanish translation / Apéndice B. Traducción al español**

### **Diferencias en reportes de biodiversidad en dos plataformas de ciencia ciudadana durante el confinamiento del COVID-19 en Colombia**

Lina María Sánchez-Clavijo\*; Sindy Jineth Martínez-Callejas; Orlando Acevedo-Charry; Angélica Díaz-Pulido; Bibiana Gómez-Valencia; Natalia Ocampo-Peñuela; David Ocampo; María Helena Olaya-Rodríguez; Juan Carlos Rey-Velasco; Carolina Soto-Vargas; Jose Manuel Ochoa-Quintero.

\*Autor para correspondencia: [lsanchez@humboldt.org.co](mailto:lsanchez@humboldt.org.co)

Todos los autores pertenecen al Instituto de Investigación de Recursos Biológicos Alexander von Humboldt, Bogotá, Colombia

#### **Para destacar:**

- Comparamos los datos de Naturalista e eBird de 2020 con los de cinco años anteriores.
- Los registros de biodiversidad durante el confinamiento provienen de regiones altamente perturbadas.
- Los menores esfuerzos de muestreo llevaron a que se registraran menos especies totales y prioritarias.
- Estos datos pueden mostrar los impactos de la “antropopausa” únicamente dentro de contextos ecológicos estrechos.
- Necesitamos construir y fortalecer redes más diversas de observadores de la biodiversidad.

## Resumen

La pandemia causada por el COVID-19 destacó el potencial de utilizar datos de proyectos de ciencia ciudadana a largo plazo para responder preguntas sobre los impactos de eventos inesperados en la biodiversidad. Evaluamos la idoneidad de los datos de las plataformas de ciencia ciudadana *iNaturalist* (Naturalista) e *eBird* para describir los efectos de la “antropopausa” en la observación de la biodiversidad en Colombia. Comparamos la distribución de registros según la huella humana, los comportamientos de muestreo, la composición general y la composición de especies prioritarias de conservación durante la fase más estricta del confinamiento por COVID-19 en 2020, con los mismos períodos en 2015-2019. La participación general en ambas plataformas durante el confinamiento fue alta en comparación con años anteriores, pero los registros se concentraron en regiones altamente transformadas, tuvieron menores esfuerzos de muestreo y se registraron menos especies. Para *eBird*, la composición de especies fue similar a la observada en años anteriores, y los registros de especies de interés para la conservación disminuyeron en proporción a la disminución en la riqueza general de especies en las muestras. Para *iNaturalist*, el grupo de especies muestreado cada año seguía siendo demasiado diferente para las comparaciones. Una vez que se tienen en cuenta las diferencias en los comportamientos de los observadores, los datos de estas plataformas se pueden utilizar en comparaciones no planificadas de especies relativamente comunes, en regiones con altos niveles de transformación humana y en contextos geográficos estrictamente definidos. Para aumentar el potencial de la ciencia ciudadana para monitorear especies más raras, áreas más naturales o ser utilizada en análisis a gran escala, necesitamos construir y fortalecer redes más diversas de observadores que puedan promover aún más la descentralización, democratización e investigación costo-efectiva de la biodiversidad.

**Palabras clave:** antropopausa, biodiversidad, ciencia ciudadana (participativa), *eBird*, huella humana, *iNaturalist* (Naturalista)

## 1. Introducción

Las plataformas de ciencia ciudadana son reconocidas por producir grandes cantidades de datos que cubren extensiones espaciales y temporales más amplias que los proyectos donde la recopilación de datos está restringida a expertos (Callaghan *et al.*, 2020). Por lo tanto, los datos de ciencia ciudadana tienen un inmenso potencial para responder preguntas ecológicas y apoyar la toma de decisiones (Kelling *et al.*, 2019; MacPhail y Colla, 2020; Pocock *et al.*, 2017). Este papel se destacó durante la “antropopausa” provocada por los confinamientos diseñados para contener la pandemia de COVID-19 en todo el mundo en el primer semestre de 2020 (ver otros manuscritos en este número especial). Antes de que podamos utilizar estos datos para probar hipótesis sobre el impacto de las actividades humanas en nuestro medio ambiente (Bates *et al.*, 2020; Duffenbaugh *et al.*, 2020; Rutz *et al.*, 2020), debemos tener en cuenta los efectos del confinamiento en el

comportamiento de los reportes e incluirlos en análisis destinados a detectar los efectos ecológicos de la pandemia en la ocurrencia de especies.

Los estudios ecológicos diseñados para comparar el estado de la biodiversidad antes y después de eventos que se espera afecten sus atributos deben estandarizar el muestreo para ambos períodos. Solo entonces las diferencias en los resultados pueden atribuirse al evento de interés (Smokorowski y Randall 2017). Cuando comenzó la pandemia de COVID-19, los investigadores respondieron diseñando estudios para caracterizar las respuestas de la biodiversidad a los cambios en el comportamiento humano durante y después del confinamiento (Bates et al.2020), pero se enfrentaron al desafío de obtener datos comparables de antes. Si bien los datos de los programas de monitoreo a largo plazo son ideales para cuantificar los efectos de eventos inesperados en la biodiversidad (Lindenmayer & Likens 2018), dichos programas aún son muy limitados en términos de sus alcances espaciales, ecológicos y taxonómicos, particularmente en países megadiversos con ingresos bajos a medios (Donald et al.2021).

Las observaciones de los proyectos de ciencia ciudadana emergen como una fuente alternativa de datos para comparaciones no planificadas y cálculo de tendencias. Sin embargo, estos proyectos tienen una amplia gama de objetivos, niveles de participación, tipos de datos y estructuras (Pocock et al., 2017). Dado que las personas contribuyen con sus observaciones de forma voluntaria, suele haber mucha flexibilidad en la recopilación de datos incluso dentro de una plataforma en particular, lo que genera una gran heterogeneidad en el registro de comportamientos. Dependiendo del tipo de inferencia que queramos hacer con base en los datos, las diferencias en el proceso de observación pueden tener fuertes efectos que podrían llevar a conclusiones engañosas si no se tienen en cuenta de forma adecuada (Burgess et al. 2016; Kelling et al., 2019).

Para evaluar el potencial y las limitaciones del uso de datos de ciencia ciudadana para responder preguntas sobre los efectos de la “antropopausa” en la biodiversidad en Colombia, seleccionamos dos plataformas populares de ciencia ciudadana: *iNaturalist* e *eBird*. Analizamos cómo cambiaron los registros durante la fase más estricta de las medidas de confinamiento de COVID-19 en 2020 en comparación con los mismos períodos de tiempo de 2015 a 2019. Centramos nuestros análisis en tres aspectos clave de los datos a nivel nacional: dónde se registraron las especies, qué comportamientos de muestreo se utilizaron para registrarlas y qué especies se registraron.

### *1.1. Distribución de registros según la huella humana*

Para hacer comparaciones a gran escala de la ocurrencia de especies antes y durante el confinamiento, el esfuerzo de muestreo debe distribuirse de manera similar según la heterogeneidad en la transformación humana, pero los datos de ciencia ciudadana tienden a agruparse espacialmente en torno a asentamientos humanos y carreteras (Johnston et al., 2020).

Los índices de huella humana miden el impacto que las actividades antropogénicas tienen en los ecosistemas (McGowan, 2016), por lo que evaluamos cómo cambió la distribución de los registros de ciencia ciudadana en relación con la huella humana durante el confinamiento de 2020 y en años anteriores. Esperábamos que el confinamiento restringiera a los científicos ciudadanos a áreas más urbanas (valores altos de huella) que naturales (valores bajos de huella). Bajo esta condición, los datos recopilados en 2020 serían una muestra de un grupo de especies diferente al de los datos recopilados en los años anteriores.

### *1.2. Comportamientos de muestreo*

La ciencia ciudadana tiene mucha variación en términos de cuánto esfuerzo invierte cada participante en recopilar o curar registros, pero los esfuerzos acumulativos más grandes en un proyecto aumentarán las posibilidades de detectar especies raras y de tener un muestreo representativo de la comunidad. Aunque las condiciones del confinamiento restringieron el tiempo que los ciudadanos científicos podían pasar al aire libre, la biodiversidad recibió mucha atención pública durante el comienzo de la pandemia (Corlett *et al.* 2020; Gardner, 2020; Semana Sostenible, 2020). Evaluamos cómo cambiaron seis métricas de comportamiento que caracterizaron los niveles y formas de participación entre las actividades de confinamiento en 2020 y años anteriores. Predijimos que la participación general en 2020 podría ser similar a la de años anteriores, pero que las métricas que describen los comportamientos de muestreo mostrarían variaciones que deberían tenerse en cuenta al realizar análisis que requieran condiciones de muestreo equivalentes.

### *1.3. Especies registradas*

Preguntamos cómo cambió la composición general y de especies prioritarias de conservación entre las actividades de confinamiento en 2020 y años anteriores. Si las muestras generales a nivel nacional mostraran bajos niveles de similitud entre los años anteriores a la pandemia (2015-2019), esto sería un indicador de que las variaciones en 2020 podrían ser más probablemente el resultado de diferencias en el proceso de observación que los efectos del confinamiento por COVID-19. Por otro lado, si las muestras mostraran altos niveles de similitud antes de 2020, sería más fácil atribuir las diferencias del último año a la pandemia. Las especies amenazadas y endémicas suelen ser más difíciles de detectar y se encuentran en áreas más naturales. Si nuestras dos hipótesis anteriores fueran ciertas, esperábamos encontrar disminuciones en los reportes de especies prioritarias para la conservación que fueran atribuibles a cambios en el proceso de observación, más que a los impactos de la pandemia en la ocurrencia de especies.

## **2. Materiales y métodos**

## 2.1. Plataformas de ciencia ciudadana: *iNaturalist* e *eBird*

*iNaturalist* es una iniciativa conjunta de la Academia de Ciencias de California y la *National Geographic Society* que conecta a los usuarios con una comunidad de científicos y naturalistas, ayudándolos a documentar e identificar la biodiversidad (Nugent, 2018). Los proyectos creados a través de *iNaturalist* no están estructurados, lo que los hace más atractivos para el público en general, pero limita el tipo de análisis que se pueden realizar con los datos recopilados (Kelling et al., 2019). Cualquier persona que aprecie la naturaleza puede usar *iNaturalist* para cargar sus registros de biodiversidad, incluso sin conocimiento previo sobre grupos taxonómicos específicos. La identificación voluntaria de especies se lleva a cabo en cualquier parte del mundo por personas con experiencia en el reconocimiento del taxón en cuestión, pero no se requieren calificaciones para determinar quién puede curar los datos (*iNaturalist*, 2020).

*eBird* es un esfuerzo de colaboración administrado por el Laboratorio de Ornitología de Cornell que permite a los observadores de aves recopilar y compartir información en forma de listas de chequeo mientras se acumula una base de datos sobre la distribución, abundancia y uso de hábitat de las aves (Sullivan et al., 2009). El uso de *eBird* requiere un conocimiento previo de las especies de aves, por lo que está dirigido a un público más reducido y, debido a que es un proyecto de ciencia ciudadana semiestructurada, permite corregir los resultados mediante medidas de esfuerzo de observación, proporcionando conjuntos de datos adecuados para una gama más amplia de análisis (Kelling et al., 2019). La calidad de los datos se controla en dos etapas; los registros primero pasan por un filtro automático que se construye de acuerdo con las distribuciones de especies aceptadas, y luego un equipo de expertos nacionales revisa los posibles errores (The Cornell Lab, 2020).

## 2.2. Conjuntos de datos utilizados en este estudio

Durante la primera iteración del mandato de respuesta al COVID-19, Colombia entró en un estricto confinamiento del 24 de marzo al 11 de mayo de 2020. Se cerraron las fronteras internacionales, se cancelaron los viajes nacionales y se restringió completamente la circulación de personas y vehículos, excepto en casos relacionados a los servicios de salud, suministro de alimentos y otros servicios esenciales (MinInterior, 2020).

Los datos de *iNaturalist* registrados durante el confinamiento de COVID-19 provienen de “*Naturalistas urbanos desde casa*” (NUC), un proyecto tipo *bio-blitz* que se creó y publicitó en todo el país del 25 de marzo al 25 de abril. Esta iniciativa desafió a las personas a registrar la mayor cantidad posible de biodiversidad alrededor de sus hogares durante el confinamiento. Una vez cerrado el proyecto, eliminamos las observaciones de especies domésticas y cautivas, y descargamos todas las observaciones verificables (aquellas que tienen al menos una fotografía o

registro de audio). Para obtener datos comparables de años anteriores, utilizamos los mismos criterios para descargar las observaciones de Colombia que se recopilaban durante el mismo período de un mes de 2015 a 2019. Estos datos incluyen registros cargados espontáneamente por los usuarios, registros en proyectos creados por usuarios y un *bio-blitz* urbano a gran escala que se organizó en Bucaramanga del 29 de marzo al 1 de abril de 2019 (datos disponibles mediante solicitud).

Para comparar patrones para los datos de *eBird*, nos enfocamos en los resultados del *Global Big Day* (GBD), un evento anual que invita a los observadores de aves de todo el mundo a usar *eBird* para reportar tantas especies y listas de chequeo como sea posible durante 24 horas (eBird, 2020a). Su popularidad en Colombia ha crecido enormemente desde 2015, y durante los últimos cuatro años el país ha ocupado el primer lugar en número de especies y el tercero en listas de chequeo enviadas (eBird, 2020b). El GBD siempre se lleva a cabo en los primeros sábados de mayo, y en 2020 coincidió con la fase de confinamiento más estricta en Colombia, lo que llevó a todas las organizaciones involucradas a promover la observación de aves desde casa durante el evento (Sierra, 2020).

El GBD ofreció la oportunidad única de tener un conjunto de datos controlado antes y durante el confinamiento, recopilado anualmente con el objetivo común de registrar todas las especies de aves en el país. Ha sido muy publicitado desde 2017, lo que ha generado niveles de participación que superan a cualquier otro evento de ciencia participativa en Colombia. Este aumento en la participación conduce a picos anuales para eBird en términos de número de listas de chequeo, registros, observadores de aves, cobertura de sitios y especies (Fig. S1), promoción de mejores prácticas y esfuerzos de los revisores para curar el conjunto de datos. Aunque el uso de conjuntos de datos recolectados durante un período más largo habría hecho que los resultados fueran menos propensos a verse afectados por anomalías que ocurrieron durante los GBD, esperábamos que los cambios en el comportamiento de los observadores fueran más obvios durante este día de lo que serían durante los demás días del confinamiento. Los datos se obtuvieron directamente de los representantes de *eBird* después de cada evento e incluyen solo los registros que pasaron el proceso de revisión de dos etapas (datos disponibles mediante solicitud).

El contenido descargado de las dos plataformas fue muy diferente. Las diferencias más notables fueron el alcance taxonómico (todos los taxones posibles para *iNaturalist* frente a solo aves para *eBird*), la duración del período de estudio (un mes frente a un día) y las diferencias mencionadas anteriormente en los procesos de calidad de los datos. Los registros de *iNaturalist* constituyen observaciones únicas de la biodiversidad sin un esfuerzo de muestreo asociado, pero requieren la verificación mediante fotografías o grabaciones de sonido. Los registros de *eBird* están organizados en listas de chequeo de especies que casi siempre tienen asociada información de esfuerzo, pero no requieren evidencia para respaldar cada avistamiento. Por lo tanto, no

comparamos patrones entre las plataformas, sino que nos enfocamos en las oportunidades y desafíos que tiene cada conjunto de datos en nuestro contexto de interés.

### *2.3. Distribución de registros según la huella humana*

Las observaciones individuales en *iNaturalist* y las listas de chequeo en *eBird* están georreferenciadas. Para cuantificar el grado de perturbación asociado con cada observación o lista, mapeamos estos puntos y extrajimos su valor correspondiente (un número entero entre 0 y 100) de una capa de Índice de Huella Humana (LHFI) con resolución de 300 m utilizando ArcGIS Pro (ESRI, 2020). Esta capa LHFI es específica de Colombia y es el resultado de combinar el tipo de uso del suelo, densidad de población rural, distancia a carreteras, distancia a asentamientos, índice de fragmentación de la vegetación natural, índice de biomasa relativo al potencial natural y tiempo de intervención en los ecosistemas (Correa Ayram *et al.*, 2020). Para los puntos en 2015 usamos la capa LHFI publicada para ese año (Correa Ayram *et al.*, 2020), mientras que para 2016 a 2020 usamos una capa no publicada actualizada para 2018 que fue proporcionada por los autores (Correa Ayram y Diaz-Timoté, *nd*). Usamos el año como variable predictiva categórica y regresiones logísticas para comparar la proporción de registros que provenían de asentamientos humanos densos (LHFI igual o mayor que 90 - Fig. S2) entre 2015 y 2020. Usamos 2020 como el intercepto en nuestros modelos para que los valores-*p* asociados con los coeficientes de regresión de todos los años anteriores se convirtieran en una prueba de si los años previos al confinamiento tenían valores estadísticamente diferentes de los valores durante el confinamiento. Posteriormente, comparamos la distribución de registros con valores de LHFI inferiores a 90 en 2019 frente a 2020 realizando una regresión binomial negativa en los recuentos de cada valor de LHFI (después de verificar los modelos de Poisson en busca de sobre-dispersión). Todos los análisis se realizaron utilizando R (R Core Team, 2013).

### *2.4. Comportamientos de muestreo*

Debido a las diferencias inherentes en la forma en que se recopilaban los datos, utilizamos diferentes métricas de respuesta para comparar los niveles y tipos de participación para ambas plataformas. Todas las comparaciones se realizaron mediante regresiones logísticas que utilizaron el año como variable predictiva categórica y 2020 como el intercepto para resaltar las diferencias entre el confinamiento y los años anteriores.

**2.4.1. Esfuerzo del observador (*iNaturalist*):** Debido a que la mayoría de los usuarios reportaron entre cero y cinco observaciones (Fig. S3), usamos la proporción de observadores que reportaron más de cinco observaciones como una medida de la proporción de participantes que intentaron caracterizar la biodiversidad a su alrededor.

**2.4.2. Esfuerzo del curador (*iNaturalist*):** Utilizamos la proporción de registros que obtuvieron grado de investigación (identificación confirmada por tres curadores) para caracterizar el esfuerzo que los voluntarios invirtieron en la identificación de especies enviadas por los observadores, ya que esta era una forma de participar en la iniciativa sin salir de la casa.

**2.4.3. Esfuerzo de distancia (*eBird*):** Después de eliminar los datos que provenían de listas mayores a 10 km, usamos la proporción de listas de chequeo con un esfuerzo de distancia igual o menor a 1 km (Fig. S3) para caracterizar el esfuerzo. Debido a que las personas pueden enviar muchas listas de verificación durante la GBD, esta métrica no se usó para caracterizar el esfuerzo individual, sino más bien cuánto se movían los observadores para construir sus listas. Además, exploramos el esfuerzo en duración (eliminando las listas con esfuerzos mayores a 6 horas y separando aquellas con esfuerzos de mayores a una hora - Fig. S4) y el tamaño del grupo (separando las listas realizadas por más de un observador - Fig. S4) para corroborar los patrones de distancia.

**2.4.4. Protocolo de muestreo (*eBird*):** Comparamos la proporción de listas de chequeo que usaban conteos estacionarios versus conteos con desplazamiento, que son los dos protocolos más populares en *eBird*, como una forma de ver si el comportamiento de muestreo variaba debido a las restricciones de movimiento durante el confinamiento.

## 2.5. Especies registradas

Para comparar la composición general de especies entre las muestras de cada año, realizamos un análisis de similitud utilizando el índice de Jaccard (Jaccard, 1901). Limitamos los datos de *iNaturalist* a las observaciones verificadas de insectos, plantas y vertebrados. Clasificamos las especies de ambos conjuntos de datos de acuerdo con su categoría de amenaza de extinción y restricciones en la distribución, como un indicador de rareza y sensibilidad a la intervención humana. Las especies amenazadas incluyeron especies en peligro crítico (CR), en peligro (EN), vulnerables (VU) y casi amenazadas (NT); las no amenazadas incluían aquellas clasificadas como de menor preocupación (LC) o datos deficientes (DD); y las endémicas a todas las especies cuya distribución geográfica está restringida a Colombia. Las categorías de amenazas correspondieron a las categorías globales de la Lista Roja de la UICN (IUCN, 2020), mientras que las endémicas se tomaron de listas reconocidas para cada grupo taxonómico de la siguiente manera: aves (Avendaño *et al.*, 2017), mamíferos (Sociedad Colombiana de Mastozoología, 2017), anfibios. (AmphibiaWeb, 2020), reptiles (Uetz *et al.*, 2020), peces (DoNascimento *et al.*, 2018) y plantas (Bernal *et al.*, 2019). A pesar de que los insectos son uno de los grupos más registrados en *iNaturalist*, Colombia no cuenta con fuentes oficiales de información sobre su nivel de amenaza o endemismo, por lo que este grupo no se clasificó en estas categorías.



Realizamos un análisis de desviación comparando modelos log-lineales de los efectos aditivos e interactivos del número de especies amenazadas/no amenazadas y endémicas/no endémicas frente al año. Supusimos que la falta de independencia entre el grupo de especies y el año para 2020 mostraría si el confinamiento tenía un efecto desproporcionado en el registro de especies prioritarias de conservación. Decidimos no utilizar la riqueza de especies como una respuesta a escala nacional porque en un país megadiverso y altamente heterogéneo como Colombia, podría haber demasiados factores además del esfuerzo del observador que influyan en esta variable en un momento dado. Por lo tanto, incluimos los valores crudos de individuos y especies registrados por año y plataforma en nuestros resultados solo para resaltar el potencial que tienen estas herramientas para detectar una gran cantidad de especies, pero no llevamos a cabo comparaciones estadísticamente rigurosas de riqueza entre años.

### 3. Resultados

Hubo una participación sustancial en ambas plataformas durante el confinamiento. NUC tuvo 1.146 participantes que contribuyeron con 8.734 observaciones en un mes, mientras que GBD tuvo 2.754 observadores de aves que contribuyeron con 7.699 listas de chequeo en un día. En comparación con los mismos períodos de tiempo en 2019, esto significó una disminución en la participación para *iNaturalist* (2.372 participantes, 20.674 observaciones) y un ligero aumento para *eBird* (2.313 observadores de aves, 7.173 listas de chequeo) (Fig.1).

#### 3.1. Distribución de registros según la huella humana

Las comparaciones visuales de la distribución espacial de los datos entre 2019 y 2020 mostraron que este último tiene más observaciones concentradas en áreas de altos valores de LHFI (urbanas y de fácil acceso), y menos observaciones en áreas con bajos valores de LHFI, como las del oriente de Colombia (Figura S5). Detrás de estos patrones hubo una tendencia de aumento constante en el uso de ambas plataformas durante el período de seis años considerado (con la excepción de un número especialmente alto de observaciones en 2019 para *iNaturalist* - Fig.1), así como un mayor sesgo hacia las ciudades en *iNaturalist* que en los conjuntos de datos del GBD (Fig. S2). La proporción de registros de áreas altamente transformadas en el conjunto de datos de *iNaturalist* fue significativamente más alta en 2020 que en 2015-2018 pero significativamente más baja que en 2019, aunque las diferencias numéricas en los coeficientes del modelo fueron pequeñas (coeficientes de regresión +/- SE y valores  $p$ ; 2020: -0,46 +/- 0,02,  $p < 2E-16$  vs 2019: 0,09 +/- 0,03,  $p = 0,0007$ ; Fig.2, Tabla S1). Las diferencias entre 2020 y todos los años anteriores fueron mayores para el conjunto de datos de *eBird* (2020: -0.58 +/- 0.03,  $p < 2E-16$  vs 2019: -1.64 +/- 0.07,  $p < 2E-16$ ), mostrando un cambio más claro en distribución durante el confinamiento (Fig. 2, Tabla S1). En ambos casos, la regresión posterior del año frente al recuento de puntos en cada valor LHFI por debajo de 90 (entornos naturales y rurales) mostró que las observaciones de 2020

provenían de puntos con niveles más altos de transformación humana (iNat: 0.02 +/- 0.005,  $p = 0,0005$ ; GBD: 0,19 +/- 0,017,  $p < 2E-16$ ; Tabla S2).

**Leyenda de la Figura 1.** Crecimiento en el uso de plataformas de ciencia ciudadana en Colombia de 2015 a 2020: a) 25 de marzo al 25 de abril para *iNaturalist*, b) Global Big Day para *eBird*; los puntos turquesa muestran los datos recopilados durante el confinamiento. Distribución de las observaciones de la ciencia ciudadana durante los períodos de estudio de acuerdo con el Índice de Huella Humana ajustado (LHFI): c) Registros de *iNaturalist*, d) Listas de chequeo de *eBird*.

### 3.2. Comportamientos de muestreo

El esfuerzo de los observadores en *iNaturalist* mostró una tendencia generalmente creciente en sus primeros cinco años, pero fue significativamente menor en 2020 que en 2019 (2020: -1.37 +/- 0.07,  $p < 2E-16$  vs. 2019: 0.75 +/- 0.09,  $p < 2E-16$ ), mostrando que en promedio, menos participantes registraron más de cinco observaciones de biodiversidad durante el confinamiento (Fig.2, Tabla S3). En términos de esfuerzo de los curadores, de 2015 a 2017 los registros que alcanzaron el grado de investigación representaron más de la mitad de los datos, pero a medida que el uso de la plataforma creció, esta proporción disminuyó. Sin embargo, esta variable fue significativamente mayor en 2020 que en 2019 (2020: -0.22 +/- 0.02,  $p < 2E-16$  vs 2019: -0.48 +/- 0.03,  $p < 2E-16$ ; Fig.2, Tabla S3). Se realizó una mayor proporción de listas de chequeo de *eBird* con esfuerzos de distancia iguales o inferiores a 1 km en 2020 que durante todos los GBD anteriores (2020: 0.26 +/- 0.04,  $p = 6E-11$  vs. 2019: -0.72 +/- 0.05,  $p < 2E-16$ ; Fig. 2, Tabla S3), y lo mismo ocurre con las listas iguales o inferiores a una hora, y las realizadas por un solo observador (Fig. S6, Tabla S3). De 2015 a 2019, los conteos con desplazamientos fueron más populares que los conteos estacionarios, pero los observadores de aves en 2020 cambiaron significativamente su estrategia de muestreo (2020: -0.16 +/- 0.03,  $p = 8E-11$  vs. 2019: 1.68 +/- 0.05,  $p < 2E-16$ ; Fig.2; Tabla S3).

**Leyenda de la Figura 2.** a) Proporción de observaciones realizadas en sitios con valores LHFI iguales o superiores a 90 del 25 de marzo al 25 de abril de 2015-2020 para *iNaturalist*; b) Proporción de observaciones realizadas en sitios con valores LHFI iguales o superiores a 90 durante los *Global Big Day* de 2015-2020 para *eBird*; c) Esfuerzo de observación para *iNaturalist*; d) Esfuerzo de curación para *iNaturalist*; e) Esfuerzo en distancia para *eBird*; f) Protocolo de muestreo para *eBird*; \* indican diferencias estadísticamente significativas entre 2020 y los años anteriores al confinamiento.

### 3.3. Especies registradas

El número de especies registradas durante el confinamiento fue menor que el año anterior. Los científicos ciudadanos contribuyeron con registros de 1.292 especies durante el NUC (34% menos de las registradas en *iNaturalist* para el mismo período en 2019, pero 11% más que en 2018) y 1.435 especies de aves durante el GBD de 2020 (9% menos que en 2019) (Tabla S4). Aunque sospechamos que estos patrones podrían explicarse por las diferencias mencionadas anteriormente

en los sitios muestreados y el esfuerzo, no corregimos los valores por esfuerzo porque no se podía hacer de manera estandarizada para los datos provenientes de ambas plataformas. El conjunto de datos de *eBird* mostró un aumento en los valores de similitud con el tiempo que se esperaba dados los aumentos en el tamaño de la muestra y el objetivo de GBD de registrar tantas especies de aves como sea posible. La composición de la muestra durante el confinamiento no fue muy diferente a la de los dos años anteriores. El caso fue diferente para *iNaturalist*, donde los valores de similitud fueron menores y no mostraron convergencia en años posteriores a pesar de los aumentos en el tamaño de la muestra (Fig. 3).

**Leyenda de la Figura 3.** Valores de similitud de Jaccard entre muestras de 2015 a 2020 para especies reportadas en *iNaturalist* durante el 25 de marzo al 25 de abril (diagonal superior) y en *eBird* durante los *Global Big Days* (diagonal inferior).

Hubo una disminución en el número de especies amenazadas y endémicas reportadas entre 2019 y 2020. Para *iNaturalist*, las especies amenazadas pasaron de 112 a 27 y las endémicas de 257 a 109; para *eBird*, las especies amenazadas pasaron de 154 a 129 y las endémicas de 56 a 47 (Fig. S7; Tabla S4). Encontramos que el estado de amenaza y el endemismo eran estadísticamente independientes del año para los datos de *eBird* (desviación amenaza\* año: 7.68,  $p = 0.18$ ; desviación endemismo\* año: 1.67,  $p = 0.89$ ), pero no para los datos de *iNaturalist* (desviación amenaza\* año: 34,14,  $p = 2E-6$ ; desviación endemismo\* año: 39,86,  $p = 2E-7$ ; Tabla S5). Una mirada más cercana a las tablas de contingencia para *iNaturalist* mostró menos especies amenazadas de lo esperado en 2020 y más especies endémicas de lo esperado en 2019 (Fig. S8).

#### 4. Discusión

Durante la fase más estricta del confinamiento por COVID-19 en Colombia, los registros de biodiversidad de las plataformas de ciencia ciudadana se concentraron en regiones altamente transformadas y se detectaron con menores esfuerzos de muestreo. Esto puede haber resultado en que se registraran menos especies, a pesar de la alta participación general que mantuvo tamaños de muestra similares a los obtenidos en años anteriores. Los cambios en la composición de especies entre 2019 y 2020 son consistentes con las tendencias a más largo plazo de 2015 a 2019, y la detección de especies de interés para la conservación no disminuyó significativamente en comparación con la riqueza general.

##### 4.1. Distribución de registros según la huella humana

Los registros de biodiversidad durante el confinamiento se concentraron en regiones con valores predominantemente altos de huella humana (media > 75). Para *iNaturalist*, esto no representó un gran cambio, ya que los datos de años anteriores ya provenían principalmente de localidades con valores de LHFI entre 50 y 100 (Fig. S2). El mayor uso de *iNaturalist* en 2019 para áreas urbanas

probablemente se debió al *bio-blitz* “Naturalista Urbano Bucaramanga”. Esperábamos que el NUC elevara las observaciones a nivel nacional a niveles similares a este evento, sin embargo durante el confinamiento, las observaciones fueron menores de lo esperado a partir de la tasa de crecimiento entre 2015-2018. Por el contrario, de 2015 a 2019, la mayoría de las listas de GBD procedían sistemáticamente de localidades con valores de LHFÍ de 25 a 75. A pesar de que todavía se muestrearon algunos lugares remotos en 2020, evidenciamos un fuerte cambio hacia la observación de aves en áreas urbanizadas en respuesta al confinamiento (Figs. 1 y 2), que coincide con el patrón general encontrado para los datos de *eBird* durante abril para otras regiones del mundo (Hochachka *et al.*, 2021).

Este patrón sugiere que es más probable que ambos conjuntos de datos sean útiles para responder preguntas sobre los impactos de la "antropopausa" en los contextos urbanos y semiurbanos donde esperaríamos ver los mayores efectos de los cambios en el comportamiento humano sobre la biodiversidad (Rastandeh y Jarchow, 2020; Rutz *et al.*, 2020; Vardi *et al.*, 2021); sin embargo, es menos probable que comparaciones similares en entornos más naturales detecten patrones biológicamente reales.

#### 4.2. *Comportamientos de muestreo*

El esfuerzo de los observadores por parte de los participantes en los eventos de ciencia ciudadana que tuvieron lugar durante el confinamiento de 2020 fue generalmente menor que en años anteriores (Figuras 2 y S6). Si bien esto no plantea problemas para el uso de los datos, merece atención al diferenciar los efectos de los cambios en el comportamiento humano del animal cuando se revisen avistamientos de vida silvestre de 2020 (Vardi *et al.*, 2021). El equipo de *eBird* alienta a los usuarios a hacer listas de chequeo más cortas para poder usar los datos en análisis que requieren altas resoluciones espaciales (The Cornell Lab, 2020). Sin embargo, no podemos determinar si los patrones observados fueron el resultado de las restricciones por el confinamiento, de personas que implementaron las mejores prácticas o una respuesta al desafío del evento que cambió de registrar el mayor número posible de especies a enviar el mayor número de listas. El cambio de muestreos con desplazamiento a muestreos estacionarios indica que muchos observadores de aves probablemente optaron por seguir la recomendación de hacer sus listas desde sus casas, reduciendo el alcance espacial de los datos para 2020 en comparación con años anteriores. Por lo tanto, algunas comparaciones de los datos de GBD antes, durante y posiblemente después del confinamiento no serán posibles a menos que se restrinjan a unidades espaciales que se muestrearon de manera similar a lo largo de los años. La evidencia de los EE.UU. y Europa también respalda la idea de que los cambios regionales en el esfuerzo de los observadores deben considerarse al intentar extraer conocimientos biológicos de los datos de *eBird* enviados durante la pandemia de COVID-19 (Hochachka *et al.*, 2021).

Hacer uso de datos auxiliares sobre el esfuerzo de muestreo es fundamental para utilizar registros de ciencia ciudadana en la evaluación de cambios en las trayectorias de la biodiversidad a lo largo del tiempo (Johnston *et al.*, 2020). Aunque el número de observaciones por observador puede dar una indicación del esfuerzo individual que los usuarios de *iNaturalist* invirtieron en documentar la biodiversidad (Milanesi *et al.* 2020), no nos permitió hacer ninguna inferencia sobre la integridad o representatividad del conjunto de datos. A pesar que los datos muestran que algunos observadores realizan esfuerzos individuales impresionantes durante el NUC (Fig. S3), nuestros resultados muestran que la mayoría de los usuarios probablemente documentaron sólo aquello que consideraron inusual. La movilidad limitada significaba que no tenían acceso a lugares que permitieran la documentación de más especies, lo que limita la mayoría de los análisis a nivel de comunidad para este conjunto de datos. Los cambios en el esfuerzo de los curadores apoyan la idea de que el confinamiento brindó una oportunidad para que los expertos en taxonomía aumentaran su participación en esta plataforma. Aún así, debe tenerse en cuenta que no tenemos información sobre la ubicación de los curadores y que su capacidad para identificar especies depende de la calidad de la evidencia cargada por los usuarios.

#### 4.3. Especies registradas

A la escala de nuestros análisis, no es posible saber si los cambios en el número de especies se debieron a cambios en las ubicaciones y comportamientos de muestreo, o si representan efectos biológicamente reales del confinamiento sobre la biodiversidad. A pesar de tener menos variación en los tipos de comunidades muestreadas (aquellas de hábitats altamente transformados), debido a que *iNaturalist* no está taxonómicamente restringido y los datos no fueron recolectados con un objetivo común durante el período de estudio, encontramos valores de similitud entre años que siempre estuvieron por debajo de 0,3 (Fig. 3). Esto muestra que cada año se toman muestras de un grupo de especies muy diferente, lo que limita severamente las inferencias que se pueden hacer sobre los efectos del confinamiento sobre la biodiversidad a gran escala. El caso puede ser diferente si los datos se limitan a taxones ampliamente distribuidos dentro de ciudades particularmente bien muestreadas (Callaghan *et al.*, 2020; Vardi *et al.*, 2021), pero tendrían que evaluarse de antemano.

Para comprender la variación en los resultados de GBD, es importante señalar que desde 2017 una iniciativa de base ha alentado a los colombianos a "ganar" este evento organizando a personas de todo el país para registrar el mayor número posible de especies. Durante 2017-2019, expertos en aves viajaron desde ciudades a lugares remotos para ayudar en los esfuerzos locales y detectar especies de interés. Dado que los viajes nacionales fueron prohibidos durante 2020, muchos observadores de aves esperaban que la lista total de especies disminuyera a los niveles registrados antes de que el grupo se organizara. La diferencia menor de lo esperado entre 2019 y 2020 muestra que la iniciativa GBD Colombia ha tenido éxito en sus esfuerzos por fortalecer las capacidades locales de observación de aves, y que el entusiasmo que este evento ha despertado en los

colombianos se prolongó hasta 2020 a pesar del confinamiento (Tabla S4). Los valores de similitud por encima de 0,6 para todas las comparaciones entre 2018, 2019 y 2020 sugieren que debido a que se mantuvieron grandes tamaños de muestra durante el confinamiento, las diferencias discutidas en las dos secciones anteriores no tuvieron un fuerte impacto en las especies registradas a gran escala (Leong y Trautwein, 2019).

No nos sorprendió encontrar menos especies amenazadas y endémicas en las muestras de 2020 en comparación con años anteriores (Fig. S7). Estas especies generalmente tienen menor detectabilidad y rangos geográficos reducidos, por lo que este resultado es coherente con las extensiones espaciales reducidas y menores esfuerzos de observación documentados durante el confinamiento. Por ejemplo, todas las aves endémicas detectadas durante el GBD en 2019, pero no en 2020, solo se pueden encontrar en localidades de difícil acceso en la Sierra Nevada de Santa Marta (*Anthocephala floriceps*, *Oxypogon cyanoaemus*, *Ramphomicron dorsale*, *Pyrrhura viridicata*, *Myiotheretes pernix* y *Troglodytes monticola*), valle del Magdalena (*Phylloscartes lanyoni*), costa noroeste del Pacífico (*Bucco noanamae*) y Parque Nacional Munchique (*Eriocnemis mirabilis*) (Maria y Olivares, 1968; Paynter, 1997; Stiles et al., 1999). Dado que las diferencias en el grupo de especies que se muestrean entre años se deben a que estas especies raras están restringidas a pocos sitios inaccesibles, sugerimos que los datos de GBD solo se utilicen para evaluar las tendencias temporales en la ocurrencia de aquellas especies que se detectaron cada año, y que esa información se puede obtener ampliando los análisis a períodos de tiempo más largos (Hochachka et al., 2021).

## 5. Conclusiones

El confinamiento asociado a la pandemia del COVID-19 pareció aumentar la conciencia pública mundial sobre la importancia de la biodiversidad y su monitoreo (Bates et al., 2020; Corlett et al., 2020; Rutz et al., 2020). La facilidad de uso de aplicaciones como *iNaturalist* e *eBird* permitió la recopilación de grandes conjuntos de datos que rodean los lugares donde viven los observadores en Colombia. Los eventos especiales que tuvieron lugar durante este período presentan una oportunidad única para la investigación de la biodiversidad durante la “antropopausa”. Nuestros resultados destacan desafíos y oportunidades sobresalientes de mejora en el uso de estos conjuntos de datos oportunistas para responder preguntas ecológicas sobre los efectos de eventos repentinos en la biodiversidad. Los estudios sobre el efecto del confinamiento sobre la biodiversidad deberían limitar cuidadosamente su escala de inferencia para aprovechar al máximo los datos de ciencia ciudadana (Hochachka et al., 2012; Johnston et al., 2020).

No es apropiado utilizar conjuntos de datos de ciencia ciudadana oportunistas para caracterizar las respuestas a la “antropopausa” en toda Colombia, pero las áreas de alta densidad humana tienen un buen potencial para tales comparaciones. Las comparaciones también deben excluir las especies

raras asociadas con los tipos de hábitats que fueron sub-muestreados. Independientemente de dónde se realicen las comparaciones, los análisis deben tener en cuenta las diferencias en el esfuerzo y los métodos de muestreo entre años. Los pasos que tomamos para revisar los datos a nivel nacional deben repetirse antes de los análisis a escalas más finas, y generalmente son aplicables a los conjuntos de datos de ciencia ciudadana que se utilizan para comparaciones no planificadas de relevancia para la conservación en otros países y contextos ecológicos.

Debido a que la mayoría de los estudios de biodiversidad realizados por universidades e institutos de investigación tienden a enfocarse en regiones más naturales (Martin *et al.*, 2012), los conjuntos de datos proporcionados por iniciativas de ciencia ciudadana son un gran complemento para estudiar el impacto de la huella humana en las especies comunes y adaptadas a perturbaciones. Todavía existen dificultades tecnológicas asociadas con el uso de plataformas digitales en las regiones rurales (Pinzón Arias *et al.*, 2020), por lo que, para aumentar el potencial de los científicos ciudadanos para monitorear especies de mayor preocupación para la conservación, necesitamos idear nuevas estrategias para involucrar personas en estas áreas para participar de manera más constante (Brown y Williams, 2019). *eBird* ha contribuido y se ha beneficiado de la descentralización en el conocimiento de las aves (Sánchez-Clavijo *et al.*, 2020), y los resultados del GBD en Colombia muestran que con acompañamiento relativamente pequeño pero constante, los científicos ciudadanos pueden contribuir al monitoreo de especies en una amplia diversidad de regiones y hábitats.

Un segundo paso para fortalecer las capacidades locales para estudiar la biodiversidad es fomentar una mayor diversidad de actores para crear proyectos que les ayuden a responder preguntas ecológicas relevantes para sus procesos de toma de decisiones (Acevedo-Charry *et al.* 2021). Muchos investigadores se preocupan por los efectos que pueden tener más usuarios sobre la calidad de los datos en estas plataformas (Burgess *et al.* 2016), pero este problema se puede mejorar de varias maneras. Primero, promoviendo mejores prácticas para recopilar, curar, procesar, analizar e interpretar datos de ciencia ciudadana (Kelling *et al.*, 2019; Ruete *et al.*, 2020). En segundo lugar, mediante la introducción de campos en sus interfaces de usuario que permitan la recopilación de datos sobre el proceso de muestreo asociado a las observaciones de biodiversidad (Gouraguine *et al.*, 2019; Johnston *et al.*, 2020).

El año 2020 será recordado por los eventos catastróficos provocados por la pandemia del COVID-19. Existe evidencia que respalda impactos tanto positivos como negativos sobre la biodiversidad asociados al confinamiento (Bates *et al.* Inédito). Con este estudio, queremos resaltar lecciones importantes que nos enseñó la pandemia sobre cómo ampliar el alcance de dónde hacemos ciencia, quién participa y qué tipo de análisis podemos realizar para evaluar los impactos de eventos repentinos en la biodiversidad. La ciencia ciudadana tiene el potencial de convertirse en una piedra angular para la investigación y el monitoreo de la biodiversidad en países megadiversos (Chandler

et al., 2017; MacPhail y Colla, 2020), y el uso creciente de plataformas disponibles públicamente indica que muchos colombianos están interesados en ayudar a documentar su biodiversidad.

## **5. Agradecimientos**

Agradecemos de todo corazón a los miles de ciudadanos científicos que han utilizado *iNaturalist* e *eBird* para documentar la biodiversidad colombiana, y especialmente a los que participan en los *bio-blitzes* organizados por el Instituto Humboldt y en la coordinación nacional y regional del Global Big Day. Sin las muchas horas de voluntarios organizando los muestreos, capacitando a las personas, compartiendo información, recolectando, curando y analizando datos, la ciencia ciudadana en Colombia no estaría donde está hoy. También agradecemos a C. Correa y J. Díaz por proporcionarnos sus capas LHF1 y a M. Tye por su asesoramiento sobre análisis estadísticos. Finalmente, agradecemos a los cuatro revisores anónimos que ayudaron a mejorar enormemente este manuscrito de su versión original. Esta investigación no recibió ninguna subvención específica de agencias de financiamiento en los sectores público, comercial o sin fines de lucro. Los autores no tienen intereses contrapuestos que declarar.

## **6. Referencias**

Ver referencias completas en el texto original en inglés.
